# Supplementary material
Source: PubMed Central journal article supplement (PMC4337976)
Supplement: NIHMS61912-supplement-01.pdf [file NIHMS61912-supplement-01.pdf]

**Supplemental Table 1. Proteins identified in exosome fraction 5 from S2 and S2 tub-Wg cells.**

| <b>CG number</b> | <b>Symbol</b>     | <b>Name</b>                                 | <b>Function</b>         |
|------------------|-------------------|---------------------------------------------|-------------------------|
| CG3644           | bic               | bicaudal (RNA binding protein)              | RNA binding             |
| CG9012           | Chc               | Clathrin heavy chain                        | Protein transport       |
| CG12055          | Gapdh1            | Glyceraldehyde 3 phosphate dehydrogenase 1  | Metabolism              |
| CG10060          | G-ialpha65A       | G protein alpha subunit 65A                 | Signalling              |
| CG8430           | Got1              | Glutamate oxaloacetate transaminase 1       | Metabolism              |
| CG7765           | Khc               | Kinesin heavy chain                         | Microtubule motor       |
| CG10120          | Men               | Malic enzyme                                | Metabolism              |
| CG8251           | Pgi               | Phosphoglucose isomerase                    | Metabolism              |
| CG3422           | Pros28.1          | Proteasome 28kD subunit 1                   | Proteasome              |
| CG7873           | Src42A            | Src oncogene at 42A                         | Signalling              |
| CG3201           | Mlc-c             | Myosin light chain cytoplasmic              | Actin cytoskeleton      |
| CG4422           | Gdi               | GDP dissociation inhibitor                  | Protein transport       |
| CG15792          | zip               | zipper (Myosin light chain binding)         | Actin cytoskeleton      |
| CG4265           | Uch               | Ubiquitin carboxy-terminal hydrolase        | Deubiquitinating enzyme |
| CG12530          | Cdc42             | Cdc42                                       | Small GTPase            |
| CG17158          | cpb               | capping protein beta                        | Actin binding           |
| CG1403           | Sep1              | Septin-1                                    | GTPase                  |
| CG6598           | Fdh               | Formaldehyde dehydrogenase                  | Metabolism              |
| CG8705           | pnut              | peanut                                      | GTPase                  |
| CG3664           | Rab5              | Rab-protein 5                               | Protein transport       |
| CG8977           | Cctgamma          | Cctgamma                                    | Chaperone               |
| CG2849           | Rala              | Ras-related protein                         | GTPase                  |
| CG4260           | $\alpha$ -Adaptin | $\alpha$ -Adaptin                           | Protein transport       |
| CG4634           | Nurf-38           | Nucleosome remodeling factor - 38kD         | Chromatin remodelling   |
| CG2151           | Trxr-1            | Thioredoxin reductase-1                     | Metabolism              |
| CG8186           | Vha36-1           | Vacuolar H <sup>+</sup> ATPase subunit 36-1 | V-ATPase                |
| CG1782           | Uba1              | Ubiquitin activating enzyme 1               | Ubiquitination          |
| CG3329           | Prosbeta2         | Proteasome beta2 subunit                    | Proteasome              |
| CG1519           | Prosalph7         | Proteasome alpha7 subunit                   | Proteasome              |
| CG2720           | Hop               | Hsp70/Hsp90 organizing protein homolog      | Chaperone               |
| CG1963           | Pcd               | pterin-4a-carbinolamine dehydratase         | Metabolism              |
| CG3637           | Cortactin         | Cortactin                                   | Actin binding           |
| CG11143          | Inos              | Inos                                        | Metabolism              |
| CG4944           | cib               | ciboulot                                    | Actin binding           |
| CG5353           | Aats-thr          | Threonyl-tRNA synthetase                    | Metabolism              |
| CG13391          | Aats-ala          | Alanyl-tRNA synthetase                      | Metabolism              |
| CG8231           | Tcp-1zeta         | T-cp1zeta                                   | Chaperone               |
| CG6606           | Rip11             | Rab11 interacting protein                   | Protein transport       |
| CG31012          | cindr             | CIN85 and CD2AP orthologue                  | Signalling              |
| CG3011           | CG3011            | -                                           | Metabolism              |
| CG1440           | CG1440            | -                                           | Peptidase               |
| CG12065          | CG12065           | -                                           | Metabolism              |
| CG10997          | Clic              | Chloride intracellular channel              | Ion channel             |
| CG6180           | CG6180            | -                                           | Lipid binding           |

|         |           |                                          |                          |
|---------|-----------|------------------------------------------|--------------------------|
| CG6523  | CG6523    | -                                        | Metabolism               |
| CG17331 | CG17331   | -                                        | Proteasome               |
| CG10602 | CG10602   | -                                        | Metabolism               |
| CG11139 | p47       | p47                                      | Membrane fusion          |
| CG5174  | CG5174    | -                                        | Metabolism               |
| CG10540 | cpa       | capping protein alpha                    | Actin binding            |
| CG4071  | Vps20     | Vacuolar protein sorting 20              | Protein transport        |
| CG12030 | Gale      | UDP-galactose 4'-epimerase               | Metabolism               |
| CG9149  | CG9149    | -                                        | Metabolism               |
| CG12013 | PHGPx     | PHGPx                                    | Metabolism               |
| CG14985 | CG14985   | -                                        | Unknown                  |
| CG4618  | CHMP2B    | Charged multivesicular body protein 2b   | Protein transport        |
| CG8582  | Sh3beta   | Sh3beta                                  | Unknown                  |
| CG6776  | CG6776    | -                                        | Metabolism               |
| CG9712  | TSG101    | tumor suppressor protein 101             | Protein transport        |
| CG6259  | CG6259    | -                                        | Protein transport        |
| CG9391  | CG9391    | -                                        | Metabolism               |
| CG9779  | vps24     | Charged multivesicular body protein 3    | Protein transport        |
| CG7415  | DppIII    | Dipeptidyl aminopeptidase III            | Metabolism               |
| CG8036  | CG8036    | -                                        | Metabolism               |
| CG16817 | CG16817   | -                                        | Unknown                  |
| CG4800  | Tctp      | Translationally controlled tumor protein | Signalling               |
| CG6783  | fabp      | fatty acid binding protein               | Fatty acid binding       |
| CG7523  | CG7523    | -                                        | Unknown                  |
| CG7048  | CG7048    | -                                        | Protein folding          |
| CG14542 | vps2      | vps2                                     | Protein transport        |
| CG12876 | ALiX      | ALG-2 interacting protein X              | Protein transport        |
| CG10687 | Aats-asn  | Asparaginyl-tRNA synthetase              | Metabolism               |
| CG3127  | Pgk       | Phosphoglycerate kinase                  | Metabolism               |
| CG7147  | kuz       | kuzbanian                                | Signalling               |
| CG10724 | flr       | flare                                    | Actin binding            |
| CG31605 | Bsg       | Basigin                                  | Ig cell adhesion protein |
| CG18495 | Prosalph1 | Proteasome alpha1 subunit                | Proteasome               |

**Supplemental Table 2. Wg-specific exosome proteins.**

| <b>CG number</b> | <b>Symbol</b> | <b>Name</b>                                    | <b>Function</b>      |
|------------------|---------------|------------------------------------------------|----------------------|
| CG6871           | Cat           | Catalase                                       | Metabolism           |
| CG17903          | Cyt-c-p       | Cytochrome c proximal                          | Metabolism           |
| CG2238           | Ef2b          | Elongation factor 2b                           | Protein translation  |
| CG10160          | ImpL3         | Ecdysone-inducible gene L3                     | Metabolism           |
| CG2671           | l(2)gl        | lethal (2) giant larvae                        | Cell polarity        |
| CG10522          | sti           | sticky                                         | Citron kinase        |
| CG1483           | Map205        | Microtubule-associated protein 205             | Microtubule binding  |
| CG11793          | Sod           | Superoxide dismutase                           | Metabolism           |
| CG5374           | T-cp1         | Tcp1-like                                      | Chaperone            |
| CG4898           | Tm1           | Tropomyosin 1                                  | Actin binding        |
| CG3401           | betaTub60D    | beta-Tubulin at 60D                            | Tubulin              |
| CG4889           | wg            | wingless                                       | Signalling           |
| CG3299           | Vinc          | Vinculin                                       | Actin binding        |
| CG3724           | Pgd           | Phosphogluconate dehydrogenase                 | Metabolism           |
| CG5920           | RpS2          | Ribosomal protein S2                           | Protein translation  |
| CG8261           | Ggamma1       | G protein gamma 1                              | Signalling           |
| CG5394           | Aats-glupro   | Glutamyl-prolyl-tRNA synthetase                | Metabolism           |
| CG13389          | RpS13         | Ribosomal protein S13                          | Protein translation  |
| CG8900           | RpS18         | Ribosomal protein S18                          | Protein translation  |
| CG11949          | cora          | coracle                                        | Actin binding        |
| CG8392           | Prosbeta1     | Proteasome beta1 subunit                       | Proteasome           |
| CG1258           | pav           | pavarotti                                      | Microtubule motor    |
| CG4799           | Pen           | Pendulin                                       | Nuclear transport    |
| -                | copia\GIP     | gag-int-pol                                    |                      |
| CG3937           | cher          | cheerio                                        | Actin binding        |
| CG11654          | Ahcy13        | Adenosylhomocysteinase at 13                   | Metabolism           |
| CG5289           | Pros26.4      | Proteasome 26S subunit subunit 4 ATPase        | Proteasome           |
| CG1088           | Vha26         | Vacuolar H <sup>+</sup> -ATPase 26kD E subunit | V-ATPase             |
| CG8014           | Rme-8         | Receptor mediated endocytosis 8                | Protein transport    |
| CG8882           | Trip1         | Trip1                                          | Protein translation  |
| CG4921           | Rab4          | Rab-protein 4                                  | Protein transport    |
| CG7111           | Rack1         | Receptor of activated protein kinase C 1       | Signalling           |
| CG2827           | Tal           | Tal                                            | Metabolism           |
| CG8649           | Fim           | Fimbrin                                        | Actin binding        |
| CG6773           | sec13         | sec13                                          | Protein transport    |
| CG32593          | Flo-2         | flotillin 2                                    | Protein transport    |
| CG7020           | DIP2          | DISCO Interacting Protein 2                    | Metabolism           |
| CG3164           | CG3164        | -                                              | ABC transporter      |
| CG7961           | alphaCop      | alpha-coatomer protein                         | Protein transport    |
| CG7935           | msk           | moleskin                                       | Nuclear transport    |
| CG7977           | RpL23A        | Ribosomal protein L23A                         | Protein translation  |
| CG6603           | Hsc70Cb       | Hsc70Cb                                        | Heat shock protein   |
| CG31911          | Ent2          | Equilibrative nucleoside transporter 2         | Nucleoside transport |
| CG9765           | tacc          | transforming acidic coiled-coil protein        | Centrosome protein   |

|         |           |                                     |                     |
|---------|-----------|-------------------------------------|---------------------|
| CG1836  | Rad23     | Rad23                               | DNA repair          |
| CG4062  | Aats-val  | Valyl-tRNA synthetase               | Metabolism          |
| CG4561  | Aats-tyr  | Tyrosyl-tRNA synthetase             | Metabolism          |
| CG11471 | Aats-ile  | Isoleucyl-tRNA synthetase           | Metabolism          |
| CG6521  | Stam      | Signal transducing adaptor molecule | Protein transport   |
| CG17273 | CG17273   | -                                   | Metabolism          |
| CG3523  | CG3523    | -                                   | Metabolism          |
| CG4094  | I(1)G0255 | lethal (1) G0255                    | Metabolism          |
| CG9474  | Snap24    | Synapse protein 24                  | Protein transport   |
| CG4930  | EndoG1    | Endonuclease G inhibitor            | Apoptosis inhibitor |
| CG3455  | Rpt4      | Rpt4                                | Proteasome          |
| CG11888 | Rpn2      | Rpn2                                | Proteasome          |
| CG7762  | Rpn1      | Rpn1                                | Proteasome          |
| CG1548  | cathD     | cathD                               | Peptidase           |
| CG4276  | aru       | arouser                             | Adaptor protein     |
| CG4535  | FKBP59    | FK506-binding protein FKBP59        | Immunophilin        |
| CG1697  | rho-4     | rhomboid-4                          | Peptidase           |
| CG9968  | Anxb11    | Annexin B11                         | Actin binding       |
| CG7635  | Mec2      | Mec2                                | Unknown             |
| CG9100  | Rab30     | Rab30                               | Protein transport   |
| CG13384 | CG13384   | -                                   | Transporter         |
| CG5604  | CG5604    | -                                   | Ubiquitination      |
| CG10641 | CG10641   | -                                   | Calcium binding     |
| CG2493  | CG2493    | -                                   | Peptidase           |
| CG1416  | CG1416    | -                                   | Chaperone           |
| CG12775 | RpL21     | Ribosomal protein L21               | Protein translation |
| CG12159 | CG12159   | -                                   | Unknown             |
| CG8258  | CG8258    | -                                   | Chaperone           |
| CG11765 | Prx2540-2 | Peroxiredoxin 2540-2                | Metabolism          |
| CG13349 | CG13349   | -                                   | Proteasome          |
| CG7008  | Tudor-SN  | Tudor-SN                            | RNA silencing       |
| CG1275  | CG1275    | -                                   | Metabolism          |
| CG17795 | mthl2     | methuselah-like 2                   | Signalling          |
| CG10103 | CG10103   | -                                   | Unknown             |
| CG9953  | CG9953    | -                                   | Peptidase           |
| CG8615  | RpL18     | Ribosomal protein L18               | Protein translation |
| CG6846  | RpL26     | Ribosomal protein L26               | Protein translation |
| CG8351  | Tcp-1eta  | Tcp-1eta                            | Chaperone           |
| CG4390  | CG4390    | -                                   | Metabolism          |
| CG7054  | CG7054    | -                                   | Lipid binding       |
| CG5854  | CG5854    | -                                   | Metabolism          |
| CG13603 | CG13603   | -                                   | Unknown             |
| CG5789  | CG5789    | -                                   | Transporter         |
| CG1883  | RpS7      | Ribosomal protein S7                | Protein translation |
| CG6757  | SH3PX1    | SH3PX1                              | Lipid binding       |
| CG31075 | CG31075   | -                                   | Metabolism          |

|         |              |                                                   |                     |
|---------|--------------|---------------------------------------------------|---------------------|
| CG31664 | CG31664      | -                                                 | Unknown             |
| CG32549 | CG32549      | -                                                 | Metabolism          |
| CG17489 | RpL5         | Ribosomal protein L5                              | Protein translation |
| CG30084 | Zasp52       | Z band alternatively spliced PDZ-motif protein 52 | Scaffold protein    |
| CG5266  | Pros25       | Proteasome 25kD subunit                           | Proteasome          |
| CG13345 | tum          | tumbleweed                                        | Signalling          |
| CG17492 | mib2         | mind bomb 2                                       | Myosin binding      |
| CG1059  | Karybeta3    | Karyopherin beta 3                                | Nuclear transport   |
| CG7439  | AGO2         | Argonaute 2                                       | RNA silencing       |
| CG32789 | HIP          | Hsc/Hsp70-interacting protein                     | Unknown             |
| CG8201  | par-1        | par-1                                             | Signalling          |
| CG9327  | Pros29       | Proteasome 29kD subunit                           | Proteasome          |
| CG15442 | RpL27A       | Ribosomal protein L27A                            | Protein translation |
| CG10260 | PI4KIIIalpha | Phosphatidylinositol 4-kinase III alpha           | Signalling          |
